# Supplementary material for: Asymmetric Schottky Barrier-Generated MoS2/WTe2 FET Biosensor Based on a Rectified Signal
Source: MDPI journal article supplement (doi:10.3390/nano14020226), 2024-01-20
Supplement: s1 [file s1]

## Supporting Materials

# Asymmetric Schottky Barrier-Generated MoS<sub>2</sub>/WTe<sub>2</sub> FET Biosensor Based on a Rectified Signal

Xinhao Zhang <sup>1,†</sup>, Shuo Chen <sup>1,†</sup>, Heqi Ma <sup>1</sup>, Tianyu Sun <sup>1</sup>, Xiangyong Cui <sup>1</sup>, Panpan Huo <sup>1</sup>,  
Baoyuan Man <sup>1,\*</sup> and Cheng Yang <sup>1,2,\*</sup>

<sup>1</sup> School of Physics and Electronics, Shandong Normal University, Jinan 250014, China; zhangxh0050@163.com (X.Z.); 1091471811@qq.com (S.C.); 1005740998@qq.com (H.M.); 377633468@qq.com (T.S.); 2199491415@qq.com (X.C.); ghost54051@qq.com (P.H.)

<sup>2</sup> Shandong Provincial Engineering and Technical Center of Light Manipulations, Shandong Normal University, Jinan 250014, China

\* Correspondence: byman@sdu.edu.cn (B.M.); chengyang@sdu.edu.cn (C.Y.)

<sup>†</sup> These authors contributed equally to this work.

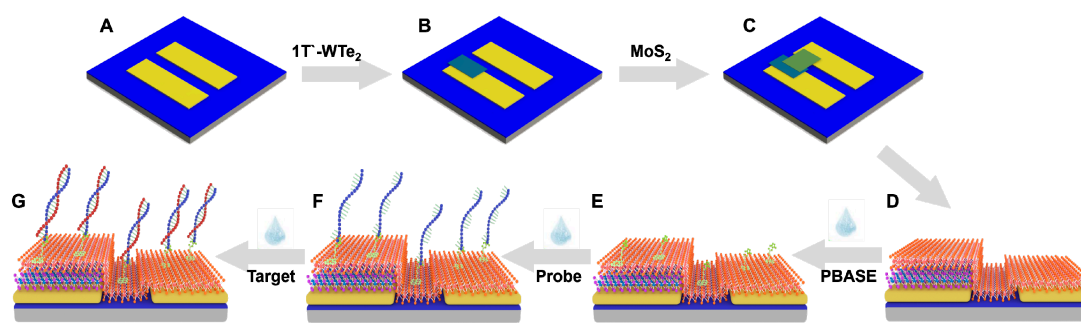

**Figure S1.** Fabrication process diagram of MoS<sub>2</sub>/WTe<sub>2</sub> FET biosensor. (A) A clean and tidy Si/SiO<sub>2</sub> substrate is prepared. (B) WTe<sub>2</sub> is transferred by using a two-dimensional material transfer platform. (C) MoS<sub>2</sub> is transferred by using a two-dimensional material transfer platform. (D) A MoS<sub>2</sub>/WTe<sub>2</sub> Schottky heterojunction is formed. (E) Add PBASE on the MoS<sub>2</sub>/WTe<sub>2</sub> FET biosensor. (F) Add probe DNA on the MoS<sub>2</sub>/WTe<sub>2</sub> FET biosensor. (G) Add target DNA on the MoS<sub>2</sub>/WTe<sub>2</sub> FET biosensor.

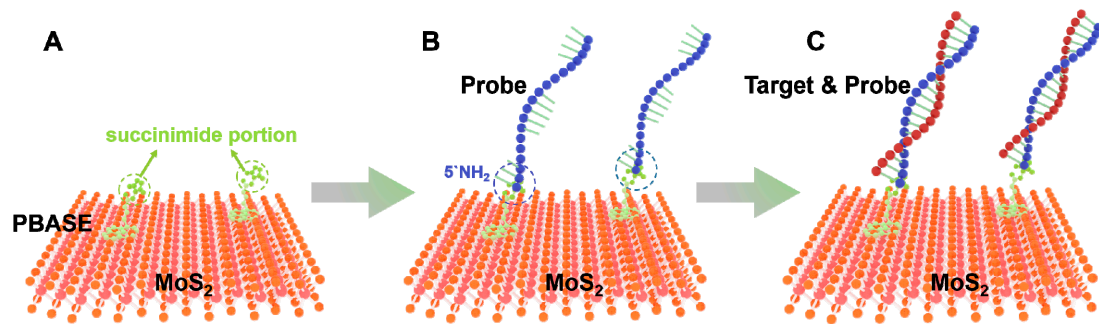

**Figure S2.** The functionalization and immobilization process of the device. (A) PBASE, when dissolved in DMSO, stacks its pyrene group on the surface of MoS<sub>2</sub>, binds to MoS<sub>2</sub>. (B) The succinimidyl ester group of PBASE is connected to the amino-modified probe DNA through a cross-linking reaction. (C) The target DNA is combined with the probe DNA through complementary base pairing.

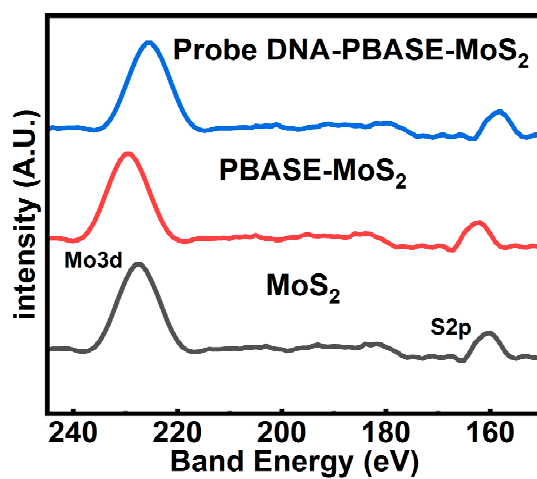

**Figure S3.** High-resolution XPS spectra of Mo 3d, S 2p. The movement of Mo 3d peak and S 2p peak confirmed that PBASE and probe DNA were successfully combined on the surface of MoS<sub>2</sub>/WTe<sub>2</sub> FET biosensor.

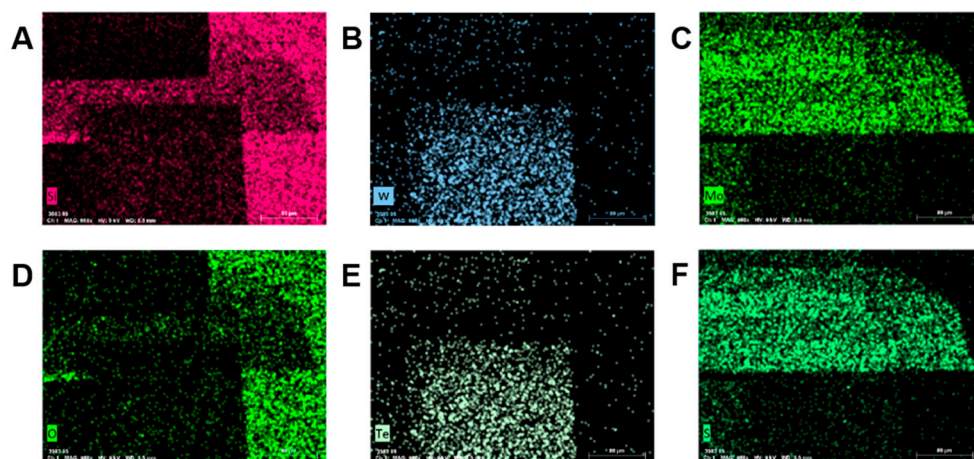

**Figure S4.** EDS images mentioned in Figure 3B. The above EDS images represent (A) Si, (B) W, (C) Mo, (D) O, (E) Te and (F) S elements respectively.

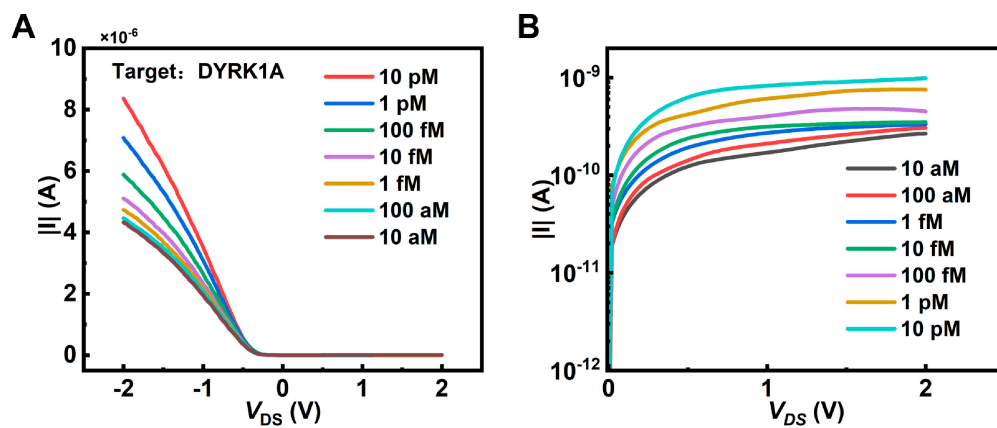

**Figure S5.** The current results of different concentrations of target DNA (DYRK1A) under (A) positive and (B) negative bias voltages.

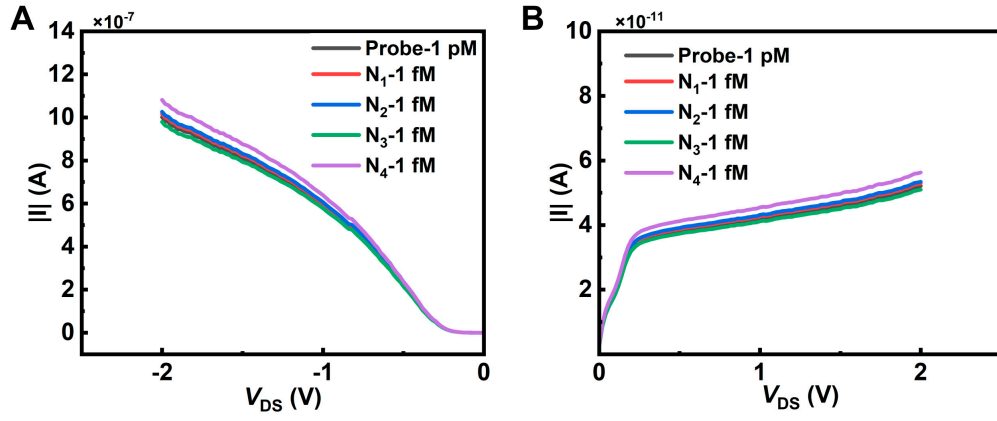

**Figure S6.** The complete current diagram after adding N<sub>1</sub>-N<sub>4</sub> samples. Source-drain current under (A) negative bias and (B) positive bias in linear scale.

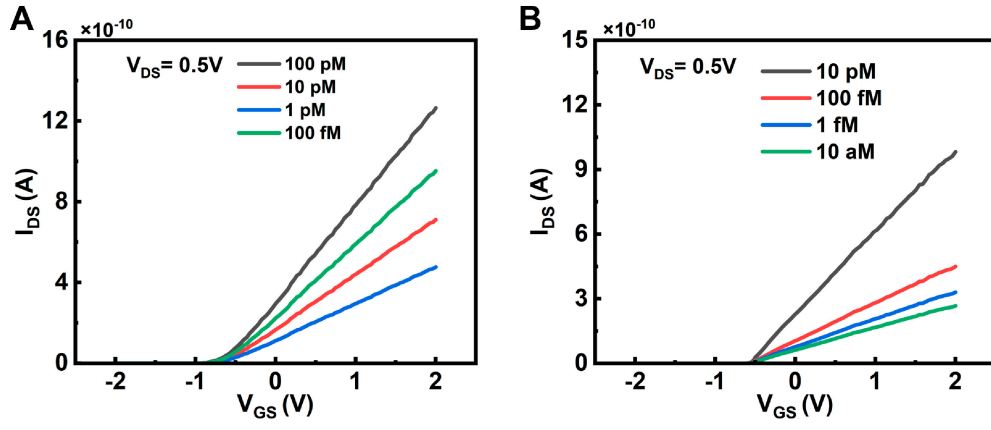

**Figure S7:** The transfer characteristics curves of the (A) Au/MoS<sub>2</sub>/Au and (B) WTe<sub>2</sub>/MoS<sub>2</sub>/Au structures, respectively.



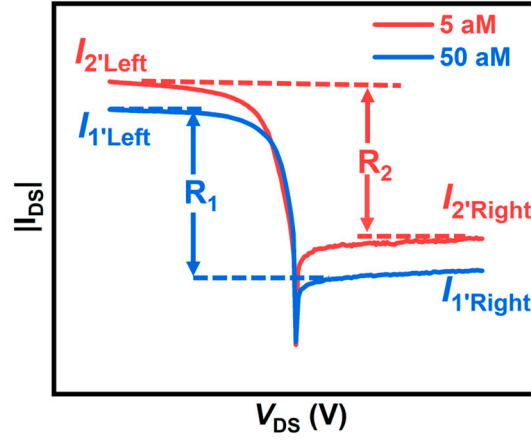

**Figure S8.** Output characteristics curves measured at different biomolecular concentrations in the MoS<sub>2</sub>/WTe<sub>2</sub> FET biosensor.  $I_1$  and  $I_2$  respectively represent the source-drain current at different concentrations,  $I_{\text{Left}}$  and  $I_{\text{Right}}$  respectively represent the source-drain current dominated by different Schottky barriers,  $R_1$  and  $R_2$  respectively represent the rectification ratio of MoS<sub>2</sub>/WTe<sub>2</sub> FET biosensor at different concentrations

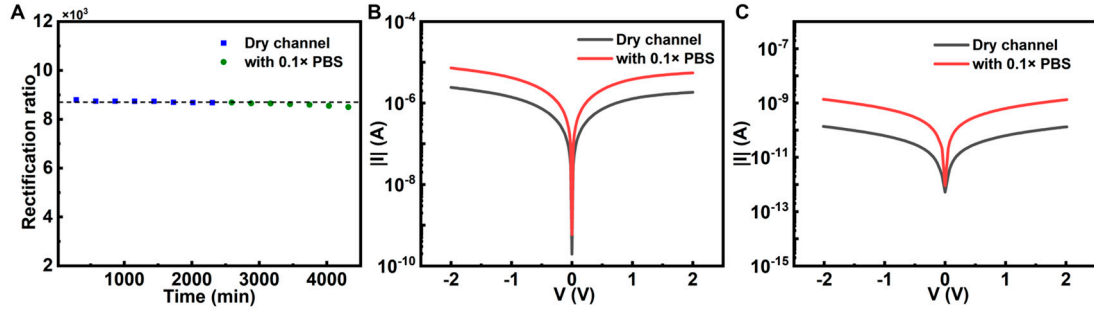

**Figure S9.** Stability comparison of “rectified signal” and “absolute value signal”. The output current curves of (A)  $\text{WTe}_2/\text{MoS}_2/\text{Au}$  FET, (B)  $\text{WTe}_2/\text{MoS}_2/\text{WTe}_2$  FET, and (C)  $\text{Au}/\text{MoS}_2/\text{Au}$  FET under external factors such as water molecules, respectively. Under external factors such as water molecules, the rectification ratio signal of the  $\text{WTe}_2/\text{MoS}_2/\text{Au}$  FET biosensor is stable within long times, as shown in Supplementary Figure 3A.

**Table S1.** The DNA sequences purchased from Sangon Biotech (Shanghai) Co., Ltd

| Names                                      | Sequences (5'→3' )                                   |
|--------------------------------------------|------------------------------------------------------|
| Probe DNA in Figs. 1B-1C, 1H-1I, 2I, 3B-3F | NH <sub>2</sub> -C <sub>6</sub> -CAGAGTCACTGACTCACTA |
| Target DNA in Figs. 1C,1I,2I,2B-2D         | TTAGTGAGTCAGTGACTCTG                                 |
| RNA in Figs. 3F-3G                         | CAGGUGGAACCUCAUCAGGAGAUGC                            |
| T1 in Figs. 3F-3G                          | TTTTTTTTTTUUUUUCCCGTCCGTATGG                         |
| T2 in Figs. 3F-3G                          | TCTCAAGGACCACCGCATCTCTACCCATAC<br>GGACGGG            |
| 3-base Mismatch DNA in Figs. 3F-3G         | TTAGTGAGTCAGTGACTGAC                                 |

Target DNA sequence in Figs. 1C,1I,2I,2B-2D was selected from GeneBank: NG\_009366.2

**Table S2.** Comparison of biosensing performance among various FET biosensors

| Sensing materials | Functional-<br>ization<br>methods | Probe<br>types | Target<br>biomarkers | LOD          | Signal<br>types           | Ref |
|-------------------|-----------------------------------|----------------|----------------------|--------------|---------------------------|-----|
| Graphene          | PBASE                             | ssDNA          | Antigen              | 2.6 pM       | $V_{Dirac}$ ;<br>$I_{DS}$ | [1] |
| rGO               | PBASE                             | Antibody       | Antigen              | 0.1<br>pg/mL | $V_{Dirac}$               | [2] |
| Graphene          | AuNPs                             | ssDNA          | 20-mer<br>DNA        | 15 aM        | $V_{CNP}$                 | [3] |
| Mxenes/graphene   | APTES                             | Antibody       | Antigen              | 1 fg/mL      | $V_G$ ; $I_{DS}$          | [4] |
| MoS <sub>2</sub>  | Physically<br>adsorb              | Antibody       | Antigen              | 1 pM         | $V_{th}$                  | [5] |
| MoS <sub>2</sub>  | AuNPs                             | ssDNA          | 30-mer<br>DNA        | 10 aM        | $I_{DS}$                  | [6] |
| rGO               | Physically<br>adsorb              | ssDNA          | 48-mer<br>DNA        | 5 pM         | $I_{DS}$                  | [7] |

|                                    |         |          |               |             |                             |              |
|------------------------------------|---------|----------|---------------|-------------|-----------------------------|--------------|
| Exfoliated-<br>Graphene            | EDC+NHS | Antibody | Antigen       | 10<br>fg/mL | Resist-<br>ance             | [8]          |
| MoS <sub>2</sub> /WTe <sub>2</sub> | PBASE   | ssDNA    | 20-mer<br>DNA | 10 aM       | Recti-<br>fication<br>ratio | This<br>work |

---

## References

1. Khan, N.I.; Mousazadehkasin, M.; Ghosh, S.; Tsavalas, J.G.; Song, E. An integrated microfluidic platform for selective and real-time detection of thrombin biomarkers using a graphene FET. *Analyst* **2020**, *145*, 4494-4503.
2. Park, D.; Kim, J.H.; Kim, H.J.; Lee, D.; Lee, D.S.; Yoon, D.S.; Hwang, K.S. Multiplexed femtomolar detection of Alzheimer's disease biomarkers in biofluids using a reduced graphene oxide field-effect transistor. *Biosens. Bioelectron.* **2020**, *167*, 112505.
3. Danielson, E.; Sontakke, V.A.; Porkovich, A.J.; Wang, Z.; Kumar, P.; Ziadi, Z.; Yokobayashi, Y.; Sowwan, M. Graphene based field-effect transistor biosensors functionalized using gas-phase synthesized gold nanoparticles. *Sens. Actuators. B: Chem* **2020**, *320*, 128432.
4. Li, Y.; Peng, Z.; Holl, N.J.; Hassan, M.R.; Pappas, J.M.; Wei, C.; Izadi, O.H.; Wang, Y.; Dong, X.; Wang, C. MXene-graphene field-effect transistor sensing of influenza virus and SARS-CoV-2. *ACS omega* **2021**, *6*, 6643-6653.
5. Park, H.; Lee, H.; Jeong, S.H.; Lee, E.; Lee, W.; Liu, N.; Yoon, D.S.; Kim, S.; Lee, S.W. MoS<sub>2</sub> field-effect transistor-amyloid- $\beta$ 1-42 hybrid device for signal amplified detection of MMP-9. *Anal. Chem.* **2019**, *91*, 8252-8258.
6. Liu, J.; Chen, X.; Wang, Q.; Xiao, M.; Zhong, D.; Sun, W.; Zhang, G.; Zhang, Z. Ultrasensitive monolayer MoS<sub>2</sub> field-effect transistor based DNA sensors for screening of down syndrome. *Nano Lett.* **2019**, *19*, 1437-1444.
7. Chan, C.; Shi, J.; Fan, Y.; Yang, M. A microfluidic flow-through chip integrated with reduced graphene oxide transistor for influenza virus gene detection. *Sens. Actuators. B: Chem* **2017**, *251*, 927-933.
8. Islam, S.; Shukla, S.; Bajpai, V.K.; Han, Y.-K.; Huh, Y.S.; Kumar, A.; Ghosh, A.; Gandhi, S. A smart nanosensor for the detection of human immunodeficiency virus and associated cardiovascular and arthritis diseases using functionalized graphene-based transistors. *Biosens. Bioelectron.* **2019**, *126*, 792-799.
